# Supplementary material for: Tristetraprolin/ZFP36 regulates the turnover of autoimmune-associated HLA-DQ mRNAs
Source: bioRxiv preprint, doi:10.1101/337907, version 2 (2019-01-08)
Supplement: Supplemental Figure 3 [file 337907_file04.pdf]

**A.**

3DQA101

UGAAUCCCAUCCUGGAA**G**GGAA-GUGCAUCGCCAUCUACAGGAGCAGAAGAGUGGACUUG

3DQA105

UGAAUCCCAUCCUGGAA**U**GGAA-GUGCAUCGCCAUCUACAGGAGCAGAAGAGUGGACUUG

H2-Aa-204

---GUCACACCCUGGAAAGGAAGGCGUGUGUCCCUUUCAGGGAAGAAGUGGGUGUGCUGG

3DQA101

CU-ACAUGACCUAGCA**C**UAU**U**CUCUGGCC**C****G**AUUUAUCAUAUCCCUUUUCUCCUCCAAAU

3DQA105

CU-ACAUGACCUAGCA**U**UAU**U**UCUGGCC**C****C**AUUUAUCAUAUCCCUUUUCUCCUCCAAAU

H2-Aa-204

GUGACCUGGCACAGUG-UGUU**U**UCUGGACCAAUUC AUGGUGUUCUUCUUCUUCUACAAGU

3DQA101

**A**UUUCUCCUCUCACCU**U**UUCUGUGGGACUUA**A****G**CUGCUAUAU**C**CCUCAGAGCUCACAAA

3DQA105

**G**UUUCUCCUCUCACCU**C**UUCUGUGGGACUUA**A****A****U**UGCUAUAU**C****U**GCUCAGAGCUCACAAA

H2-Aa-204

**G**ACCCCAACUUGCUUUUCUCUUGACCCUGAG**G**CUGU----CC**C**UCUCACAGCUCACACA

3DQA101

UG**U**CUUU

3DQA105

UG**C**CUUU

H2-Aa-204

C-**C**CUUG

**B.**

|           | 3DQA101 | 3DQA105 | H2-Aa-204 | GC   |
|-----------|---------|---------|-----------|------|
| 3DQA101   |         | 94.1    | 57.8      | 0.46 |
| 3DQA105   | 174/185 |         | 57.8      | 0.44 |
| H2-Aa-204 | 108/187 | 108/187 |           | 0.52 |

**C.**

3DQB102

UGACUCCUGAGACU**A**UUUU**A**-ACU**G**GA---**U**UGGUUAUCACU**U**UUCUG---**U****A****C**GCCU

3DQB105

UGACUCCUGAGACU**G**UUUU**A**-ACU**A**GA---**C**UGGUUAUCACU**C**UUCUG---**U****G****A****U**GCCU

H2-Ab1-201

UGACUCAGUUGACU**G**UCUCAGACU**G**UAAGAC**C**UGAAUGUCUCUGCUCGCCGAAUCC**U**GACU

3DQB102

GCUUGUC--CCUGCC-----CAGAAUUC--CCAGCUG**U**CUGUGU-----CAG**C**CUG

3DQB105

GCUUGUC--CCUGCC-----CAGAAUUC--CCAGCUG**C**CUGUGU-----CAG**C****U**UG

H2-Ab1-201

GCCAGUCCACCUGCCACUCCGACUCAGAGUCUAGCAUGGUA**C**UAUUGUAUCCACCAC**C****U**C

3DQB102

UCCCCUGAGAUC-**A**GAGUCCUACAG----UGGCUGUCACGCA**G**CCACCAGGU-----

3DQB105

UCCCCUGAGAUC-**A**AGUCCUACAG----UGGCUGUCACGCA**A**CCACCAGGU-----

H2-Ab1-201

AGCUCUUGUGAUCUG**G**AGUCCCCAGUCUCUGUCUGUAGCUCU**G**CUCCUUGGUGAUUCCA

3DQB102

-----CAUCUCCUUUCAUCCCCACC**U**UGAGGCG**G**AUGGCUGUGACCC-----

3DQB105

-----CAUCUCCUUUCAUCCCCACC**C**CAAGGCG-**C**UGGCUGUGACUC-----

H2-Ab1-201

GAGACUCCAUCUGUGUACAGCCGCACC**C**CAGGCUUU**C**UGUCUUCGAUCUGUAGUAAACCA

3DQB102

-----**U**ACUU-----CCUGCACU-----GACCCA**C**AGCC

3DQB105

-----**U**GCUU-----CCUGCACU-----GACCCA**A**AGCC

H2-Ab1-201

AUGUAU**G**CUUAUCCCCACCUAGAUUACAAUAAACGAGACUCA**A**GACUC

**D.**

|            | 3DQA102 | 3DQA105 | H2-Ab1-201 | GC   |
|------------|---------|---------|------------|------|
| 3DQA102    |         | 92.3    | 43.4       | 0.55 |
| 3DQA105    | 193/209 |         | 45.8       | 0.55 |
| H2-Ab1-201 | 125/288 | 132/288 |            | 0.50 |
