# Supplementary material for: Tristetraprolin/ZFP36 regulates the turnover of autoimmune-associated HLA-DQ mRNAs
Source: bioRxiv or medRxiv preprint supplement (doi:10.1101/337907), 2019-01-08
Supplement: Supplementary file [file media-1.pdf]

**1****2**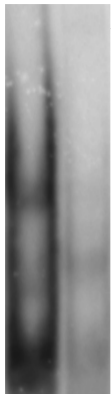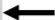**3****4**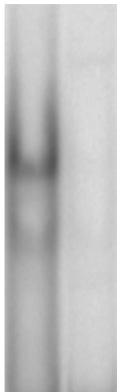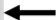**3DQA101****3DQA105**

Labeled RNAs
