# Supplementary material for: Tristetraprolin/ZFP36 regulates the turnover of autoimmune-associated HLA-DQ mRNAs
Source: bioRxiv or medRxiv preprint supplement (doi:10.1101/337907), 2019-01-08

# Non-CD Associated

## A. 3DQA101

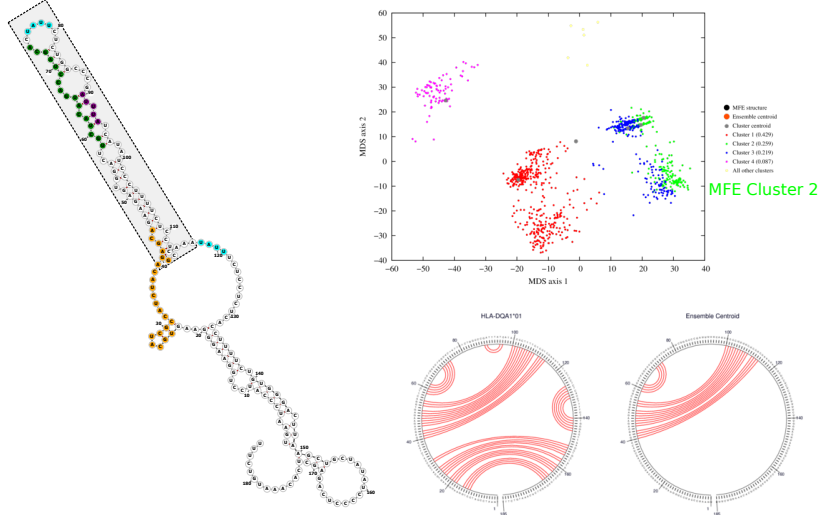

# CD Associated

## B. 3DQA105

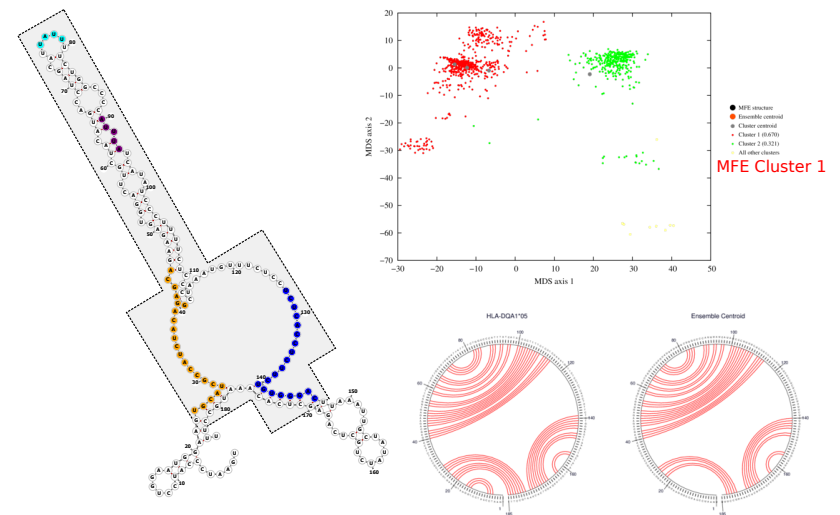

## C. 3DQB105

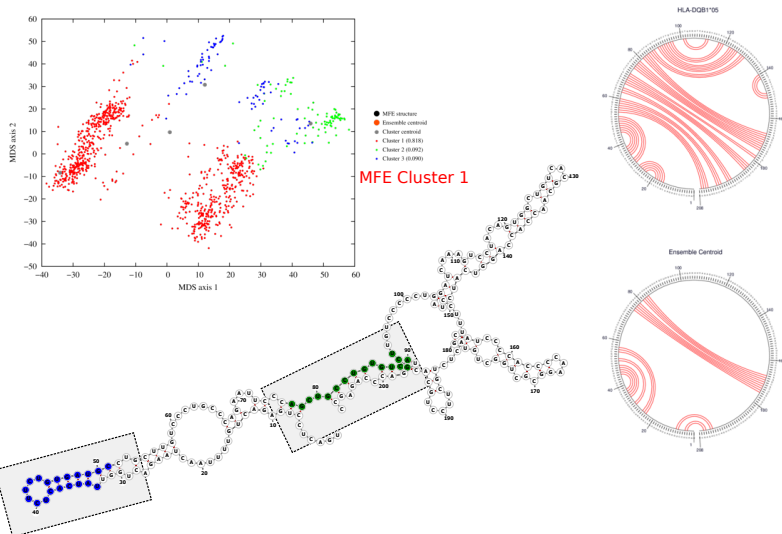

## D. 3DQB102

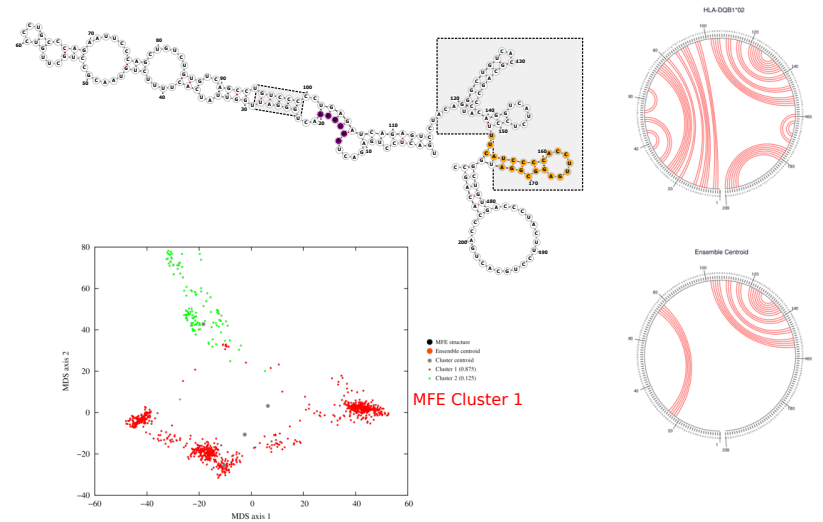

Supplement: Supplementary file [file media-2.pdf]
